# Supplementary material
Source: ML conference proceedings conference paper supplement (https://openreview.net/forum?id=tCFYwPdmT4)
Supplement: supplementary_material [file raw_data_samples.xlsx]

## Sheet: Sheet1
	doi	public_year	title	material	material_type	first_product	first_product_faraday_efficiency	second_product	second_product_faraday_efficiency	third_product	third_product_faraday_efficiency	synthesis_method	synthesis_method_sentence	control_method	control_method_type	control_method_sentence	voltage	electrolyte	current_density	cell setup
1	10.1002/adfm.201910118	2020	Enhanced Electrochemical CO2 Reduction of Cu@CuxO Nanoparticles Decorated on 3D Vertical Graphene with Intrinsic sp(3)-type Defect	Cu@CuxO Nanoparticles Decorated on 3D Vertical Graphene	Cu/C	HCOOH	40	C2H4	5	C2H5OH	5	electrochemical method	Synthesis of Cu/VG-Ar, Cu/VG, and Cu/GP : The Cu/VG-Ar, Cu/VG, and Cu/GP were prepared through a galvanostatic PED method. The Cu precursor used for PED was prepared by CuSO4∙5H2O (0	the well-dispersed Cu@CuxO nanoparticles deposited on the defective VG-Ar	composite	The improved CO2 reduction performance of Cu/VG-Ar originates from the well-dispersed Cu@CuxO nanoparticles deposited on the defective VG-Ar. The intrinsic carbon defects on VG-Ar can suppress the hydrogen evolution reaction as well as tune the interaction between VG and Cu@CuxO, thus impeding the excessive oxidation of Cu2O species deposited on VG-Ar.	-1.2 V vs. RHE	0.1 M KHCO3	5.6 mA/cm2	H-type cell
2	10.1002/adfm.202101255	2021	Symmetry-Broken Au-Cu Heterostructures and their Tandem Catalysis Process in Electrochemical CO2 Reduction	Au-Cu Heterostructures	Cu-M	C2H4	41.5	C2H6	5.1			wet chemical method	[55] Growth of the Au NBP–Cu Janus Nanostructures: Typically, the obtained Au NBP solution (5 mL) was centrifuged at 7500 rpm for 10 min, followed by washing with deionized water (5 mL) to remove the excess surfactant	the Au-Cu Janus architectures with the tandem catalysis mechanism	composite	The excellent electrocatalytic performances benefit from the special design of the Au-Cu Janus architectures and their tandem catalysis mechanism as well as the high-index facets on Au nanocrystals.	-0.981 V vs. RHE	0.1 M KHCO3		H-type cell
3	10.1002/adfm.202101668	2021	Engineering Silver-Enriched Copper Core-Shell Electrocatalysts to Enhance the Production of Ethylene and C2+ Chemicals from Carbon Dioxide at Low Cell Potentials	Silver-Enriched Copper	Cu-M	C2H4	34					solvothermal method	Preparation of Cu Nanoparticles (Cu Core ) : The synthesis of NPs used in these experiments was modified from multiple sources.[64,73,74,77,78]The growth of the Cu NPs was achieved in a single pot under a CO gas environment	Silver-Enriched Copper Core-Shell Electrocatalysts	structure control	Engineering Silver-Enriched Copper Core-Shell Electrocatalysts to Enhance the Production of Ethylene and C2+ Chemicals from Carbon Dioxide at Low Cell Potentials Copper catalysts are widely studied for the electroreduction of carbon dioxide (CO2) to value-added hydrocarbon products.	-2.5 V	1 M KOH		flow cell
4	10.1002/adfm.202102142	2021	Cu/Cu2O Interconnected Porous Aerogel Catalyst for Highly Productive Electrosynthesis of Ethanol from CO2	Cu/Cu2O	CuOx	C2H5OH	41.2	C2H4	39.5	CH4	5	wet chemical method	2 O aerogel was prepared by a simple wet chemical redox reaction in an aqueous	Cu/Cu2O Interconnected Porous Aerogel Catalyst	structure control	Cu/Cu2O Interconnected Porous Aerogel Catalyst for Highly Productive Electrosynthesis of Ethanol from CO2 Use of Cu and Cu+ is one of the most promising approaches for the production of C-2 products by the electrocatalytic CO2 reduction reaction (CO2RR) because it can facilitate CO2 activation and C-C dimerization.	-1.1 V vs. RHE	0.1 M KCl	32.55 mA/cm2	H-type cell
5	10.1002/adfm.202113252	2021	Vapor-Fed Electrolyzers for Carbon Dioxide Reduction Using Tandem Electrocatalysts: Cuprous Oxide Coupled with Nickel-Coordinated Nitrogen-Doped Carbon	copper nanocubes and nickel-coordinated nitrogen-doped carbon	Cu/C	C2H4	40							a tandem electrocatalyst composed of copper nanocubes and nickel-coordinated nitrogen-doped carbon	composite	The enhancements are attributed to the increased local CO availability near the copper surface via effective CO2 to CO conversion on neighboring NiNC. The experimental results are validated by 3D resolved continuum simulations, which show increased flux of higher-order products with the added CO flux from NiNC.	-0.6 V vs. RHE	1 M KOH	60 mA/cm2	flow cell
6	10.1002/adfm.202113335	2022	Amino Modified Carbon Dots with Electron Sink Effect Increase Interface Charge Transfer Rate of Cu-Based Electrocatalyst to Enhance the CO2 Conversion Selectivity to C2H4	Cu/CuO	CuOx	C2H4	56.6	CO	7.4			solvothermal method		–NH2-modified carbon dots (NCDs) can regulate the electron transfer behavior on Cu/CuO catalyst	composite	On one hand, NCDs reduce the electron transfer resistance between Cu/CuO particles, increasing the overall electron transfer rate by 37%; on the other hand, NCDs with electron sink effect can increase the electron concentration on catalyst surface significantly. These effects significantly promote the C-C coupling reactions over NCDs/Cu/CuO composite catalysts.	-1.4 V vs. RHE	0.5 M KHCO3	42.45 mA/cm2	H-type cell
7	10.1002/adma.201706194	2018	Amorphizing of Cu Nanoparticles toward Highly Efficient and Robust Electrocatalyst for CO2 Reduction to Liquid Fuels with High Faradaic Efficiencies	Cu	Cu	HCOOH	37	C2H5OH	22	CO	5.8	wet chemical method	As illustrated in Figure 1 a, the catalysts of a-Cu and c-Cu can be synthesized by direct reduction methods using dif - ferent reducing agents at room temperature. Briefly, with the assistance of a tender reducing agent of tannic acid (TA), CuCl2could be reduced to a-Cu, when replaced with a strong reducing agent of sodium borohydride (NaBH4), the reduced product is its opposite crystallographic …	amorphous Cu NPs	structure control	In this study, as a proof-of-concept experiment, first a facile while very effective protocol is proposed to synthesize amorphous Cu NPs.	-1.201 V vs. RHE	0.1 M KHCO3
8	10.1002/adma.201803111	2018	A Highly Porous Copper Electrocatalyst for Carbon Dioxide Reduction	Highly Porous Copper Electrocatalyst	Cu	C2H4	38.6					thermal treatment	Nanoporous Cu catalyst was synthesized by precipitating a Cu salt in an ammonia solution, followed by thermal annealing and in situ electrochemical reduction	Highly Porous Copper Electrocatalyst	structure control	Herein, a nanoporous copper CO2 reduction catalyst is synthesized and integrated into a microfluidic CO2 flow cell electrolyzer.	-0.67 V vs. RHE	1 M KOH	252.06 mA/cm2
9	10.1002/adma.202004393	2021	2D Copper Tetrahydroxyquinone Conductive Metal-Organic Framework for Selective CO2 Electrocatalysis at Low Overpotentials	Copper Tetrahydroxyquinone Conductive Metal-Organic Framework	Cu-MOF	CO	91					wet chemical method	Experimental Section Cathode Preparation : Cu  THQ NFs were synthesized using a liquid-	copper tetrahydroxyquinone	atomic level dispersion	Herein, an excellent catalytic activity of a 2D copper (Cu)-based conductive MOF, copper tetrahydroxyquinone (Cu-THQ), is reported for aqueous CO2 reduction reaction (CO2RR) at low overpotentials.	-0.45 V vs. RHE	1 M KOH	157.43 mA/cm2	H-type cell
10	10.1002/adma.202106028	2021	Synergistic Effect of Cu2O Mesh Pattern on High-Facet Cu Surface for Selective CO2 Electroreduction to Ethanol	Cu2O Mesh Pattern on High-Facet Cu Surface	CuOx	C2H5OH	43							creating high-facets of wrinkled Cu surrounded by Cu2O mesh patterns	structure control	Here, a combined structure with Cu+ and high-facets as electrocatalysts is constructed by creating high-facets of wrinkled Cu surrounded by Cu2O mesh patterns.
